# Supplementary material for: Thermoelasticity in organic semiconductors determined with terahertz spectroscopy and quantum quasi-harmonic simulations
Source: Royal Society of Chemistry journal article supplement (doi:10.1039/d0tc01676d), 2020-01-01
Supplement: d0tc01676d2.pdf [file d0tc01676d2.pdf]

## Supporting information for:

# Thermoelasticity in Organic Semiconductors Determined with Terahertz Spectroscopy and Quantum Quasi-Harmonic Simulations

Peter A. Banks,<sup>†</sup> Jefferson Maul,<sup>‡</sup> Mark T. Mancini,<sup>†</sup> Adam C. Whalley,<sup>†</sup>  
Alessandro Erba,<sup>‡</sup> and Michael T. Ruggiero<sup>\*,†</sup>

<sup>†</sup>*Department of Chemistry, University of Vermont, 82 University Place, Burlington,  
Vermont 05405, United States of America*

<sup>‡</sup>*Dipartimento di Chimica, Università di Torino, via Giuria 5, 10125 Torino, Italy*

E-mail: Michael.Ruggiero@uvm.edu

# 1 Rubrene

## 1.1 Structural Parameters

Table S1: Theoretical cell coordinates for rubrene corresponding to 0 K (no ZPE), calculated with the 6-31G(d,p)/PBE-D3 method. The crystal structure has symmetry  $Cmca$ , with corresponding cell parameters of:  $a = 26.3024 \text{ \AA}$ ,  $b = 7.1293 \text{ \AA}$ ,  $c = 13.9250 \text{ \AA}$ , and  $\alpha = \beta = \gamma = 90^\circ$

| Atom | X/A    | Y/B     | Z/C     |
|------|--------|---------|---------|
| C    | 0.0280 | 0.0000  | 0.0000  |
| C    | 0.0545 | -0.1460 | 0.0495  |
| C    | 0.0276 | -0.3005 | 0.0882  |
| C    | 0.0533 | -0.4520 | 0.1361  |
| C    | 0.0270 | 0.4051  | 0.1802  |
| C    | 0.1097 | -0.1335 | 0.0745  |
| C    | 0.1460 | -0.2553 | 0.0341  |
| C    | 0.1962 | -0.2562 | 0.0671  |
| C    | 0.2115 | -0.1322 | 0.1399  |
| C    | 0.1759 | -0.0089 | 0.1803  |
| C    | 0.1254 | -0.0112 | 0.1482  |
| H    | 0.0948 | -0.4510 | 0.1386  |
| H    | 0.0474 | 0.2936  | 0.2180  |
| H    | 0.1344 | -0.3491 | -0.0241 |
| H    | 0.2238 | -0.3538 | 0.0361  |
| H    | 0.2511 | -0.1327 | 0.1645  |
| H    | 0.1870 | 0.0890  | 0.2373  |
| H    | 0.0974 | 0.0833  | 0.1803  |

Table S2: Theoretical cell coordinates for rubrene corresponding to 0 K, calculated with the 6-31G(d,p)/PBE-D3 method. The crystal structure has symmetry  $Cmca$ , with corresponding cell parameters of:  $a = 26.4074 \text{ \AA}$ ,  $b = 7.1469 \text{ \AA}$ ,  $c = 14.0632 \text{ \AA}$ , and  $\alpha = \beta = \gamma = 90^\circ$

| Atom | X/A    | Y/B     | Z/C     |
|------|--------|---------|---------|
| C    | 0.0279 | 0.0000  | 0.0000  |
| C    | 0.0543 | -0.1452 | 0.0494  |
| C    | 0.0275 | -0.2988 | 0.0883  |
| C    | 0.0531 | -0.4494 | 0.1362  |
| C    | 0.0269 | 0.4085  | 0.1803  |
| C    | 0.1093 | -0.1324 | 0.0743  |
| C    | 0.1456 | -0.2533 | 0.0343  |
| C    | 0.1956 | -0.2539 | 0.0672  |
| C    | 0.2106 | -0.1307 | 0.1397  |
| C    | 0.1749 | -0.0084 | 0.1798  |
| C    | 0.1247 | -0.0109 | 0.1477  |
| H    | 0.0944 | -0.4484 | 0.1386  |
| H    | 0.0472 | 0.2976  | 0.2179  |
| H    | 0.1342 | -0.3468 | -0.0235 |
| H    | 0.2232 | -0.3506 | 0.0364  |
| H    | 0.2499 | -0.1310 | 0.1645  |
| H    | 0.1858 | 0.0889  | 0.2365  |
| H    | 0.0966 | 0.0826  | 0.1795  |

Table S3: Theoretical cell coordinates for rubrene corresponding to 100 K, calculated with the 6-31G(d,p)/PBE-D3 method. The crystal structure has symmetry  $Cmca$ , with corresponding cell parameters of:  $a = 26.4315 \text{ \AA}$ ,  $b = 7.1535 \text{ \AA}$ ,  $c = 14.1023 \text{ \AA}$ , and  $\alpha = \beta = \gamma = 90^\circ$

| Atom | X/A    | Y/B     | Z/C     |
|------|--------|---------|---------|
| C    | 0.0279 | 0.0000  | 0.0000  |
| C    | 0.0543 | -0.1449 | 0.0494  |
| C    | 0.0275 | -0.2983 | 0.0883  |
| C    | 0.0530 | -0.4486 | 0.1363  |
| C    | 0.0269 | 0.4096  | 0.1804  |
| C    | 0.1092 | -0.1320 | 0.0742  |
| C    | 0.1455 | -0.2528 | 0.0345  |
| C    | 0.1955 | -0.2530 | 0.0674  |
| C    | 0.2104 | -0.1297 | 0.1397  |
| C    | 0.1747 | -0.0076 | 0.1796  |
| C    | 0.1245 | -0.0103 | 0.1474  |
| H    | 0.0943 | -0.4476 | 0.1386  |
| H    | 0.0472 | 0.2990  | 0.2180  |
| H    | 0.1342 | -0.3464 | -0.0231 |
| H    | 0.2231 | -0.3495 | 0.0368  |
| H    | 0.2497 | -0.1297 | 0.1644  |
| H    | 0.1855 | 0.0897  | 0.2361  |
| H    | 0.0964 | 0.0830  | 0.1791  |

Table S4: Theoretical cell coordinates for rubrene corresponding to 200 K, calculated with the 6-31G(d,p)/PBE-D3 method. The crystal structure has symmetry  $Cmca$ , with corresponding cell parameters of:  $a = 26.4788 \text{ \AA}$ ,  $b = 7.1649 \text{ \AA}$ ,  $c = 14.1800 \text{ \AA}$ , and  $\alpha = \beta = \gamma = 90^\circ$

| Atom | X/A    | Y/B     | Z/C     |
|------|--------|---------|---------|
| C    | 0.0279 | 0.0000  | 0.0000  |
| C    | 0.0542 | -0.1444 | 0.0494  |
| C    | 0.0274 | -0.2972 | 0.0884  |
| C    | 0.0529 | -0.4470 | 0.1363  |
| C    | 0.0269 | 0.4117  | 0.1804  |
| C    | 0.1090 | -0.1313 | 0.0741  |
| C    | 0.1454 | -0.2517 | 0.0347  |
| C    | 0.1952 | -0.2516 | 0.0676  |
| C    | 0.2100 | -0.1286 | 0.1396  |
| C    | 0.1742 | -0.0069 | 0.1791  |
| C    | 0.1241 | -0.0098 | 0.1470  |
| H    | 0.0942 | -0.4460 | 0.1387  |
| H    | 0.0471 | 0.3014  | 0.2180  |
| H    | 0.1341 | -0.3453 | -0.0226 |
| H    | 0.2229 | -0.3478 | 0.0372  |
| H    | 0.2491 | -0.1284 | 0.1644  |
| H    | 0.1850 | 0.0902  | 0.2354  |
| H    | 0.0961 | 0.0831  | 0.1784  |

Table S5: Theoretical cell coordinates for rubrene corresponding to 300 K, calculated with the 6-31G(d,p)/PBE-D3 method. The crystal structure has symmetry  $Cmca$ , with corresponding cell parameters of:  $a = 26.5250 \text{ \AA}$ ,  $b = 7.1795 \text{ \AA}$ ,  $c = 14.2851 \text{ \AA}$ , and  $\alpha = \beta = \gamma = 90^\circ$

| Atom | X/A    | Y/B     | Z/C     |
|------|--------|---------|---------|
| C    | 0.0278 | 0.0000  | 0.0000  |
| C    | 0.0541 | -0.1437 | 0.0494  |
| C    | 0.0274 | -0.2957 | 0.0886  |
| C    | 0.0529 | -0.4447 | 0.1366  |
| C    | 0.0268 | 0.4147  | 0.1807  |
| C    | 0.1088 | -0.1303 | 0.0740  |
| C    | 0.1452 | -0.2505 | 0.0351  |
| C    | 0.1949 | -0.2503 | 0.0679  |
| C    | 0.2095 | -0.1275 | 0.1395  |
| C    | 0.1738 | -0.0061 | 0.1785  |
| C    | 0.1238 | -0.0090 | 0.1464  |
| H    | 0.0940 | -0.4437 | 0.1389  |
| H    | 0.0471 | 0.3051  | 0.2183  |
| H    | 0.1340 | -0.3441 | -0.0218 |
| H    | 0.2226 | -0.3463 | 0.0378  |
| H    | 0.2486 | -0.1273 | 0.1643  |
| H    | 0.1844 | 0.0908  | 0.2345  |
| H    | 0.0957 | 0.0837  | 0.1775  |

Table S6: Theoretical cell coordinates for rubrene corresponding to 300 K, calculated with the 6-31G(d,p)/PBE0-D3 method. The crystal structure has symmetry *Cmca*, with corresponding cell parameters of:  $a = 26.5407 \text{ \AA}$ ,  $b = 7.1277 \text{ \AA}$ ,  $c = 14.1557 \text{ \AA}$ , and  $\alpha = \beta = \gamma = 90^\circ$

| Atom | X/A    | Y/B     | Z/C     |
|------|--------|---------|---------|
| C    | 0.0276 | 0.0000  | 0.0000  |
| C    | 0.0536 | -0.1443 | 0.0493  |
| C    | 0.0271 | -0.2962 | 0.0881  |
| C    | 0.0525 | -0.4465 | 0.1358  |
| C    | 0.0267 | 0.4126  | 0.1793  |
| C    | 0.1082 | -0.1323 | 0.0737  |
| C    | 0.1442 | -0.2498 | 0.0325  |
| C    | 0.1937 | -0.2502 | 0.0647  |
| C    | 0.2084 | -0.1309 | 0.1377  |
| C    | 0.1729 | -0.0124 | 0.1791  |
| C    | 0.1232 | -0.0147 | 0.1476  |
| H    | 0.0934 | -0.4457 | 0.1380  |
| H    | 0.0468 | 0.3021  | 0.2163  |
| H    | 0.1330 | -0.3412 | -0.0252 |
| H    | 0.2211 | -0.3442 | 0.0329  |
| H    | 0.2473 | -0.1313 | 0.1621  |
| H    | 0.1836 | 0.0817  | 0.2363  |
| H    | 0.0954 | 0.0758  | 0.1805  |

## 1.2 Predicted Elastic Tensors

### 1.2.1 PBE

0 K (no ZPE)

$$c_{ij} = \begin{bmatrix} 28.530 & 8.480 & 9.390 & 0.000 & 0.000 & 0.000 \\ 8.480 & 19.74 & 11.690 & 0.000 & 0.000 & 0.000 \\ 9.390 & 11.690 & 13.650 & 0.000 & 0.000 & 0.000 \\ 0.000 & 0.000 & 0.000 & 8.470 & 0.000 & 0.000 \\ 0.000 & 0.000 & 0.000 & 0.000 & 3.500 & 0.000 \\ 0.000 & 0.000 & 0.000 & 0.000 & 0.000 & 3.710 \end{bmatrix} \text{GPa} \quad (1)$$

0 K

$$c_{ij} = \begin{bmatrix} 24.720 & 7.190 & 7.940 & 0.000 & 0.000 & 0.000 \\ 7.190 & 17.640 & 10.310 & 0.000 & 0.000 & 0.000 \\ 7.940 & 10.310 & 11.830 & 0.000 & 0.000 & 0.000 \\ 0.000 & 0.000 & 0.000 & 7.590 & 0.000 & 0.000 \\ 0.000 & 0.000 & 0.000 & 0.000 & 3.310 & 0.000 \\ 0.000 & 0.000 & 0.000 & 0.000 & 0.000 & 3.150 \end{bmatrix} \text{GPa} \quad (2)$$

100 K

$$c_{ij} = \begin{bmatrix} 23.693 & 6.768 & 7.584 & 0.000 & 0.000 & 0.000 \\ 6.768 & 17.033 & 9.961 & 0.000 & 0.000 & 0.000 \\ 7.584 & 9.961 & 11.367 & 0.000 & 0.000 & 0.000 \\ 0.000 & 0.000 & 0.000 & 7.322 & 0.000 & 0.000 \\ 0.000 & 0.000 & 0.000 & 0.000 & 3.255 & 0.000 \\ 0.000 & 0.000 & 0.000 & 0.000 & 0.000 & 3.003 \end{bmatrix} \text{GPa} \quad (3)$$



**200 K**

$$c_{ij} = \begin{bmatrix} 21.715 & 6.137 & 6.920 & 0.000 & 0.000 & 0.000 \\ 6.137 & 15.931 & 9.270 & 0.000 & 0.000 & 0.000 \\ 6.920 & 9.270 & 10.451 & 0.000 & 0.000 & 0.000 \\ 0.000 & 0.000 & 0.000 & 6.827 & 0.000 & 0.000 \\ 0.000 & 0.000 & 0.000 & 0.000 & 3.155 & 0.000 \\ 0.000 & 0.000 & 0.000 & 0.000 & 0.000 & 2.718 \end{bmatrix} \text{ GPa} \quad (4)$$

**300 K**

$$c_{ij} = \begin{bmatrix} 19.500 & 5.530 & 6.240 & 0.000 & 0.000 & 0.000 \\ 5.530 & 14.470 & 8.210 & 0.000 & 0.000 & 0.000 \\ 6.240 & 8.210 & 9.040 & 0.000 & 0.000 & 0.000 \\ 0.000 & 0.000 & 0.000 & 6.170 & 0.000 & 0.000 \\ 0.000 & 0.000 & 0.000 & 0.000 & 2.990 & 0.000 \\ 0.000 & 0.000 & 0.000 & 0.000 & 0.000 & 2.390 \end{bmatrix} \text{ GPa} \quad (5)$$

### 1.2.2 PBE0

**300 K**

$$c_{ij} = \begin{bmatrix} 18.645 & 5.713 & 6.148 & 0.000 & 0.000 & 0.000 \\ 5.713 & 15.541 & 8.544 & 0.000 & 0.000 & 0.000 \\ 6.148 & 8.544 & 10.121 & 0.000 & 0.000 & 0.000 \\ 0.000 & 0.000 & 0.000 & 6.842 & 0.000 & 0.000 \\ 0.000 & 0.000 & 0.000 & 0.000 & 3.355 & 0.000 \\ 0.000 & 0.000 & 0.000 & 0.000 & 0.000 & 2.450 \end{bmatrix} \text{ GPa} \quad (6)$$

### 1.3 Vibrational Mode Types

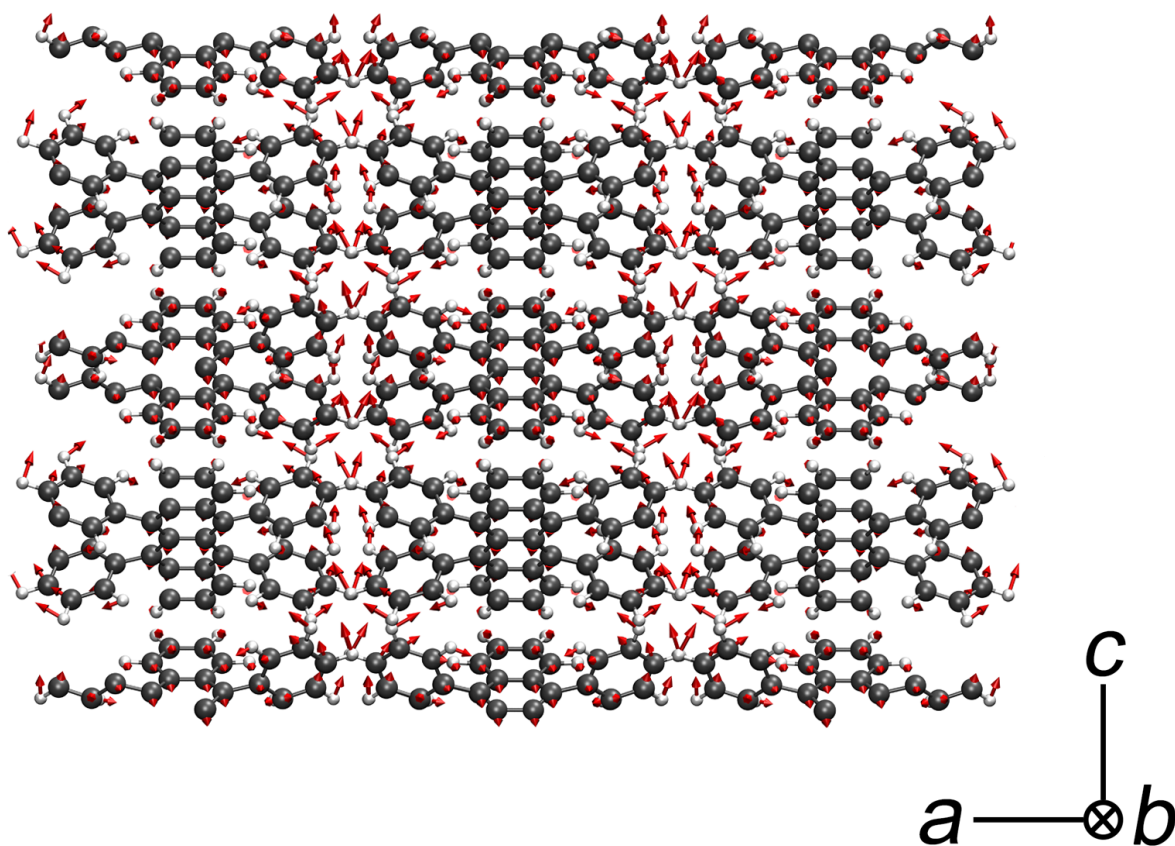

**Figure S1:** Calculated molecular motions of rubrene low-frequency vibrational mode with vibrational transition frequency of  $36.50\text{ cm}^{-1}$ , with atomic displacements illustrated with red arrows.

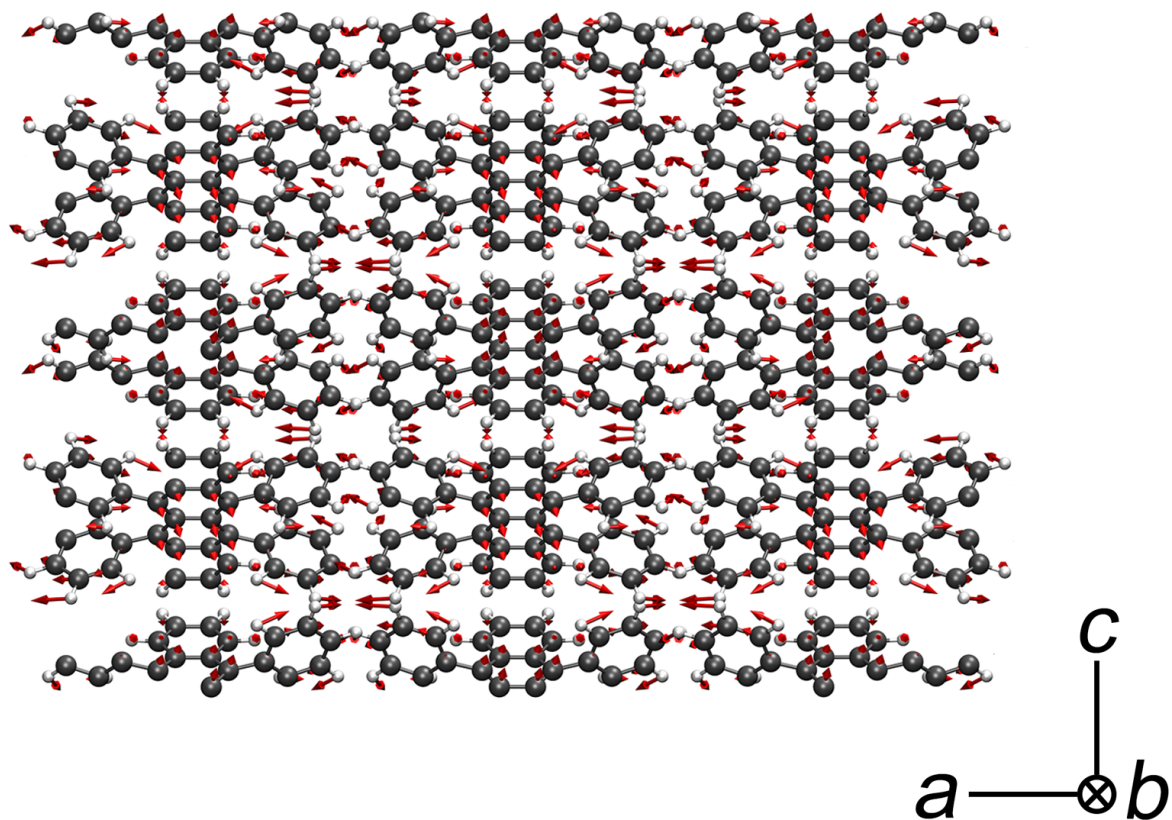

**Figure S2:** Calculated molecular motions of rubrene low-frequency vibrational mode with vibrational transition frequency of  $49.67\text{ cm}^{-1}$ , with atomic displacements illustrated with red arrows.

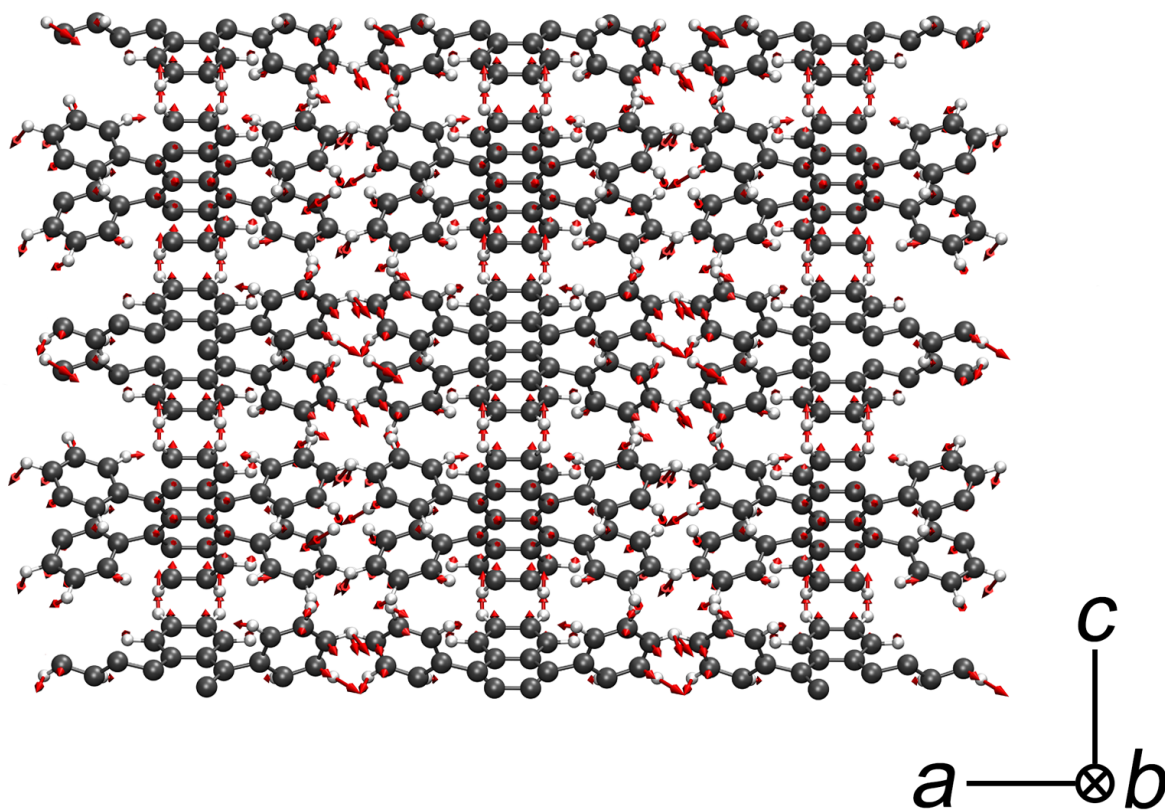

**Figure S3:** Calculated molecular motions of rubrene low-frequency vibrational mode with vibrational transition frequency of  $74.62\text{ cm}^{-1}$ , with atomic displacements illustrated with red arrows.

## 2 BTBT

### 2.1 Structural Parameters

Table S7: Experimental cell coordinates for BTBT, collected at 100 K. The crystal structure has symmetry  $P2_1/c$ , with corresponding cell parameters of:  $a = 11.8134 \text{ \AA}$ ,  $b = 5.8786 \text{ \AA}$ ,  $c = 7.9700 \text{ \AA}$ ,  $\alpha = \gamma = 90^\circ$ , and  $\beta = 106.1180^\circ$ .

| Atom | X/A    | Y/B    | Z/C    |
|------|--------|--------|--------|
| S    | 0.4204 | 0.2135 | 0.3590 |
| C    | 0.6510 | 0.4119 | 0.5174 |
| C    | 0.5248 | 0.4062 | 0.4724 |
| C    | 0.6927 | 0.6143 | 0.6109 |
| C    | 0.7319 | 0.2581 | 0.4813 |
| C    | 0.8130 | 0.6627 | 0.6694 |
| C    | 0.8915 | 0.5080 | 0.6321 |
| C    | 0.8512 | 0.3076 | 0.5387 |
| H    | 0.907  | 0.205  | 0.514  |
| H    | 0.8388 | 0.799  | 0.734  |
| H    | 0.7057 | 0.128  | 0.422  |
| H    | 0.9724 | 0.542  | 0.673  |

Table S8: Experimental cell coordinates for BTBT, collected at 200 K. The crystal structure has symmetry  $P2_1/c$ , with corresponding cell parameters of:  $a = 11.8458 \text{ \AA}$ ,  $b = 5.8857 \text{ \AA}$ ,  $c = 8.0368 \text{ \AA}$ ,  $\alpha = \gamma = 90^\circ$ , and  $\beta = 106.3150^\circ$ .

| Atom | X/A    | Y/B    | Z/C    |
|------|--------|--------|--------|
| S    | 0.5796 | 0.7844 | 0.6418 |
| C    | 0.5246 | 0.4070 | 0.4721 |
| C    | 0.6506 | 0.4128 | 0.5171 |
| C    | 0.6922 | 0.6137 | 0.6109 |
| C    | 0.8123 | 0.6615 | 0.6696 |
| C    | 0.7311 | 0.2600 | 0.4806 |
| C    | 0.8500 | 0.3093 | 0.5381 |
| C    | 0.8903 | 0.5083 | 0.6318 |
| H    | 0.7042 | 0.1330 | 0.4190 |
| H    | 0.8387 | 0.7980 | 0.7330 |
| H    | 0.9712 | 0.5420 | 0.6720 |
| H    | 0.9043 | 0.2090 | 0.5110 |

Table S9: Experimental cell coordinates for BTBT, collected at 300 K. The crystal structure has symmetry  $P2_1/c$ , with corresponding cell parameters of:  $a = 11.8780 \text{ \AA}$ ,  $b = 5.8820 \text{ \AA}$ ,  $c = 8.0920 \text{ \AA}$ ,  $\alpha = \gamma = 90.0000^\circ$ , and  $\beta = 106.4890^\circ$ .

| Atom | X/A    | Y/B    | Z/C    |
|------|--------|--------|--------|
| S    | 0.5795 | 0.7826 | 0.6425 |
| C    | 0.3083 | 0.3872 | 0.3883 |
| C    | 0.3491 | 0.5871 | 0.4836 |
| C    | 0.4750 | 0.5921 | 0.5276 |
| C    | 0.2692 | 0.7387 | 0.5197 |
| C    | 0.1510 | 0.6875 | 0.4620 |
| C    | 0.1862 | 0.3432 | 0.3309 |
| C    | 0.1100 | 0.4935 | 0.3680 |
| H    | 0.2949 | 0.8715 | 0.5812 |
| H    | 0.0973 | 0.7869 | 0.4873 |
| H    | 0.1583 | 0.2122 | 0.2682 |
| H    | 0.0297 | 0.4656 | 0.3299 |

Table S10: Theoretical cell coordinates for BTBT corresponding to 0 K, without inclusion of zero point energy. The crystal structure has symmetry  $P2_1/c$ , with corresponding cell parameters of:  $a = 11.8080 \text{ \AA}$ ,  $b = 5.8280 \text{ \AA}$ ,  $c = 7.8291 \text{ \AA}$ ,  $\alpha = \gamma = 90^\circ$ , and  $\beta = 105.9956^\circ$ .

| Atom | X/A    | Y/B     | Z/C     |
|------|--------|---------|---------|
| S    | 0.4202 | -0.2065 | 0.3590  |
| C    | 0.3063 | -0.3833 | 0.3881  |
| C    | 0.1859 | -0.3339 | 0.3300  |
| H    | 0.1554 | -0.1760 | 0.2574  |
| C    | 0.1070 | -0.4910 | 0.3676  |
| H    | 0.1308 | -0.4533 | 0.3250  |
| C    | 0.1475 | 0.3052  | 0.4612  |
| H    | 0.8460 | 0.1858  | 0.4912  |
| C    | 0.2675 | 0.2544  | -0.4825 |
| H    | 0.2979 | 0.0965  | -0.4103 |
| C    | 0.3487 | 0.4099  | 0.4817  |
| C    | 0.4746 | 0.4040  | -0.4729 |

Table S11: Theoretical cell coordinates for BTBT corresponding to 0 K, with the inclusion of zero point energy. The crystal structure has symmetry  $P2_1/c$ , with corresponding cell parameters of:  $a = 11.8578 \text{ \AA}$ ,  $b = 5.8588 \text{ \AA}$ ,  $c = 7.8904 \text{ \AA}$ ,  $\alpha = \gamma = 90^\circ$ , and  $\beta = 106.0777^\circ$

| Atom | X/A    | Y/B     | Z/C     |
|------|--------|---------|---------|
| C    | 0.4747 | 0.4048  | -0.4728 |
| C    | 0.3492 | 0.4108  | 0.4820  |
| H    | 0.2988 | 0.0996  | -0.4098 |
| C    | 0.2681 | 0.2563  | -0.4820 |
| H    | 0.0862 | 0.1880  | 0.4915  |
| C    | 0.1488 | 0.3066  | 0.4616  |
| H    | 0.0148 | -0.4538 | 0.3254  |
| C    | 0.1085 | -0.4910 | 0.3680  |
| H    | 0.1565 | -0.1783 | 0.2578  |
| C    | 0.1870 | -0.3351 | 0.3304  |
| C    | 0.3069 | -0.3840 | 0.3884  |
| S    | 0.4204 | -0.2086 | 0.3589  |

Table S12: Theoretical cell coordinates for BTBT corresponding to 100 K. The crystal structure has symmetry  $P2_1/c$ , with corresponding cell parameters of:  $a = 11.8740 \text{ \AA}$ ,  $b = 5.8703 \text{ \AA}$ ,  $c = 7.9096 \text{ \AA}$ ,  $\alpha = \gamma = 90^\circ$ , and  $\beta = 106.0873^\circ$

| Atom | X/A    | Y/B     | Z/C     |
|------|--------|---------|---------|
| S    | 0.4206 | -0.2093 | 0.3589  |
| C    | 0.3072 | -0.3842 | 0.3885  |
| C    | 0.1874 | -0.3354 | 0.3305  |
| H    | 0.1569 | -0.1791 | 0.2580  |
| C    | 0.1089 | -0.4909 | 0.3682  |
| H    | 0.0154 | -0.4538 | 0.3256  |
| C    | 0.1493 | 0.3072  | 0.4618  |
| H    | 0.0867 | 0.1889  | 0.4917  |
| C    | 0.2684 | 0.2570  | -0.4819 |
| H    | 0.2990 | 0.1008  | -0.4096 |
| C    | 0.3494 | 0.4111  | 0.4822  |
| C    | 0.4748 | 0.4051  | -0.4727 |



Table S13: Theoretical cell coordinates for BTBT corresponding to 200 K. The crystal structure has symmetry  $P2_1/c$ , with corresponding cell parameters of:  $a = 11.9092 \text{ \AA}$ ,  $b = 5.8904 \text{ \AA}$ ,  $c = 7.9548 \text{ \AA}$ ,  $\alpha = \gamma = 90^\circ$ , and  $\beta = 106.0937^\circ$

| Atom | X/A    | Y/B     | Z/C     |
|------|--------|---------|---------|
| S    | 0.4208 | -0.2108 | 0.3588  |
| C    | 0.3077 | -0.3848 | 0.3886  |
| C    | 0.1883 | -0.3362 | 0.3308  |
| H    | 0.1579 | -0.1806 | 0.2583  |
| C    | 0.1100 | -0.4909 | 0.3686  |
| H    | 0.0167 | -0.4540 | 0.3260  |
| C    | 0.1502 | 0.3083  | 0.4622  |
| H    | 0.0878 | 0.1905  | 0.4921  |
| C    | 0.2690 | 0.2584  | -0.4815 |
| H    | 0.2996 | 0.1030  | -0.4091 |
| C    | 0.3498 | 0.4117  | 0.4825  |
| C    | 0.4748 | 0.4057  | -0.4726 |

Table S14: Theoretical cell coordinates for BTBT corresponding to 300 K. The crystal structure has symmetry  $P2_1/c$ , with corresponding cell parameters of:  $a = 11.9357 \text{ \AA}$ ,  $b = 5.9084 \text{ \AA}$ ,  $c = 8.0010 \text{ \AA}$ ,  $\alpha = \gamma = 90^\circ$ , and  $\beta = 105.8121^\circ$

| Atom | X/A    | Y/B     | Z/C     |
|------|--------|---------|---------|
| S    | 0.4217 | -0.2123 | 0.3585  |
| C    | 0.3086 | -0.3851 | 0.3885  |
| C    | 0.1896 | -0.3367 | 0.3306  |
| H    | 0.1595 | -0.1820 | 0.2580  |
| C    | 0.1112 | -0.4906 | 0.3683  |
| H    | 0.0183 | -0.4540 | 0.3254  |
| C    | 0.1509 | 0.3098  | 0.4619  |
| H    | 0.0885 | 0.1927  | 0.4917  |
| C    | 0.2692 | 0.2601  | -0.4815 |
| H    | 0.2994 | 0.1056  | -0.4089 |
| C    | 0.3501 | 0.4125  | 0.4825  |
| C    | 0.4747 | 0.4064  | -0.4725 |

## 2.2 Elastic Tensors

0 K (no ZPE)

$$c_{ij} = \begin{bmatrix} 33.487 & 4.254 & 6.004 & 0.000 & 5.948 & 0.000 \\ 4.254 & 15.515 & 10.892 & 0.000 & -1.442 & 0.000 \\ 6.004 & 10.892 & 12.541 & 0.000 & -1.161 & 0.000 \\ 0.000 & 0.000 & 0.000 & 7.520 & 0.000 & 0.205 \\ 5.948 & -1.442 & -1.161 & 0.000 & 2.412 & 0.000 \\ 0.000 & 0.000 & 0.000 & 0.205 & 0.000 & 6.491 \end{bmatrix} \text{ GPa} \quad (7)$$

0 K

$$c_{ij} = \begin{bmatrix} 28.486 & 3.541 & 5.125 & 0.000 & 5.026 & 0.000 \\ 3.541 & 13.585 & 9.589 & 0.000 & -1.346 & 0.000 \\ 5.125 & 9.589 & 10.947 & 0.000 & -1.090 & 0.000 \\ 0.000 & 0.000 & 0.000 & 6.825 & 0.000 & 0.044 \\ 5.026 & -1.346 & -1.090 & 0.000 & 2.005 & 0.000 \\ 0.000 & 0.000 & 0.000 & 0.044 & 0.000 & 5.539 \end{bmatrix} \text{ GPa} \quad (8)$$

100 K

$$c_{ij} = \begin{bmatrix} 26.764 & 3.308 & 4.757 & 0.000 & 4.801 & 0.000 \\ 3.308 & 12.940 & 9.186 & 0.000 & -1.270 & 0.000 \\ 4.757 & 9.186 & 10.442 & 0.000 & -1.063 & 0.000 \\ 0.000 & 0.000 & 0.000 & 6.606 & 0.000 & 0.013 \\ 4.801 & -1.270 & -1.063 & 0.000 & 1.914 & 0.000 \\ 0.000 & 0.000 & 0.000 & 0.013 & 0.000 & 5.215 \end{bmatrix} \text{ GPa} \quad (9)$$

**200 K**

$$c_{ij} = \begin{bmatrix} 23.947 & 2.923 & 4.185 & 0.000 & 4.275 & 0.000 \\ 2.923 & 11.733 & 8.390 & 0.000 & -1.273 & 0.000 \\ 4.815 & 8.390 & 9.573 & 0.000 & -1.002 & 0.000 \\ 0.000 & 0.000 & 0.000 & 6.223 & 0.000 & -0.086 \\ 4.275 & -1.273 & -1.002 & 0.000 & 1.665 & 0.000 \\ 0.000 & 0.000 & 0.000 & -0.086 & 0.000 & 4.616 \end{bmatrix} \text{ GPa} \quad (10)$$

**300 K**

$$c_{ij} = \begin{bmatrix} 20.241 & 2.470 & 3.615 & 0.000 & 3.588 & 0.000 \\ 2.470 & 10.492 & 7.613 & 0.000 & -1.239 & 0.000 \\ 3.615 & 7.613 & 8.644 & 0.000 & -0.945 & 0.000 \\ 0.000 & 0.000 & 0.000 & 5.762 & 0.000 & -0.197 \\ 3.588 & -1.239 & -0.945 & 0.000 & 1.457 & 0.000 \\ 0.000 & 0.000 & 0.000 & -0.197 & 0.000 & 4.010 \end{bmatrix} \text{ GPa} \quad (11)$$

## 2.3 Vibrational Mode Types

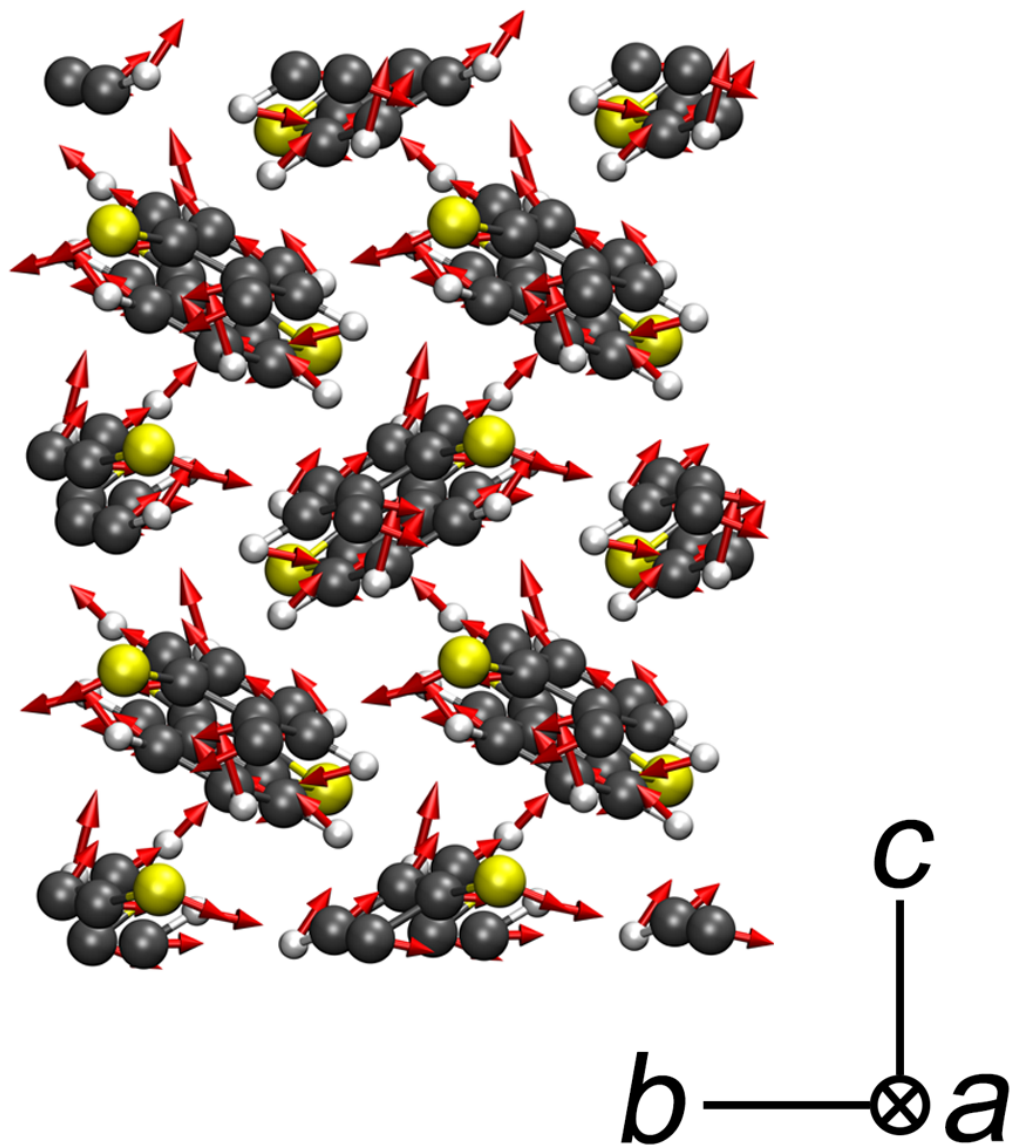

**Figure S4:** Calculated molecular motions of BTBT low-frequency vibrational mode with vibrational transition frequency of  $58.98 \text{ cm}^{-1}$ , with atomic displacements illustrated with red arrows.

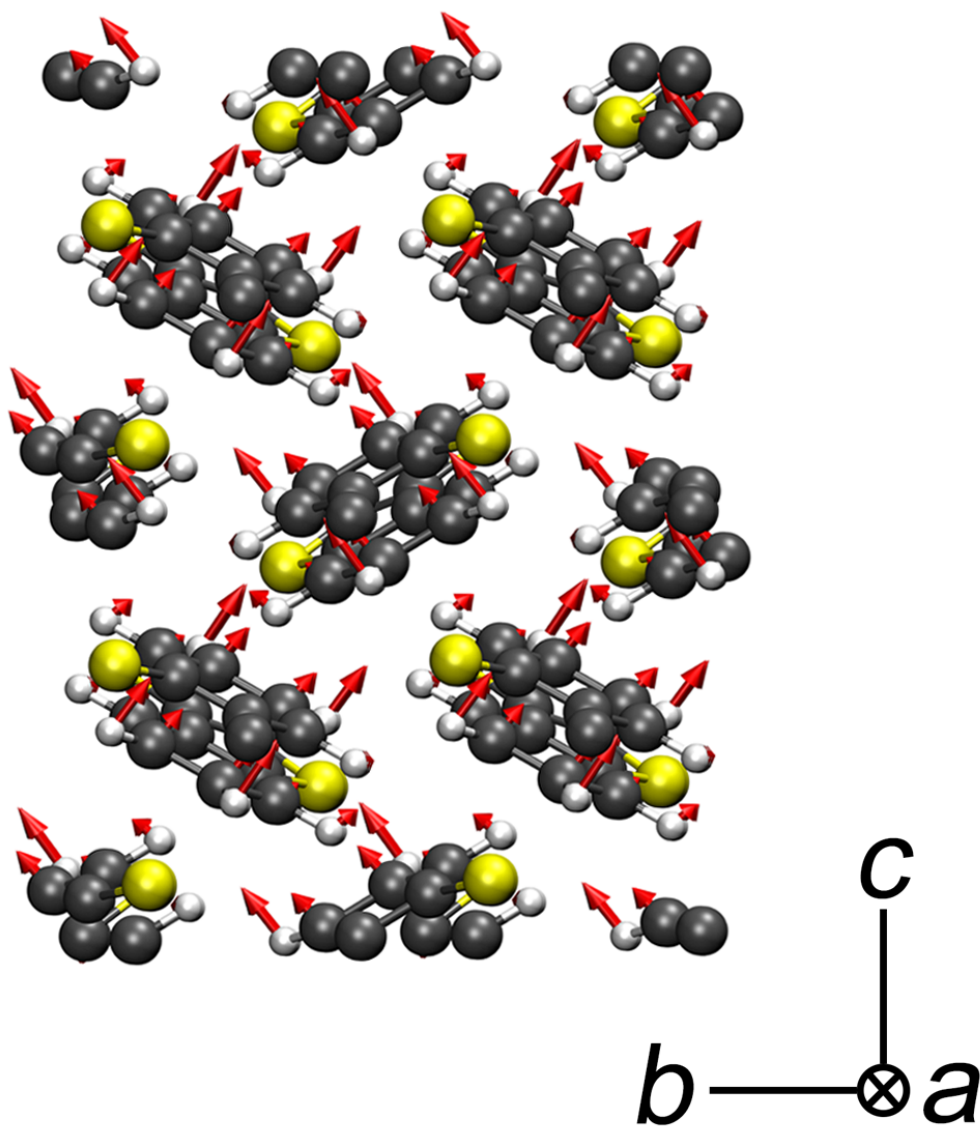

**Figure S5:** Calculated molecular motions of BTBT low-frequency vibrational mode with vibrational transition frequency of  $65.85\text{ cm}^{-1}$ , with atomic displacements illustrated with red arrows.

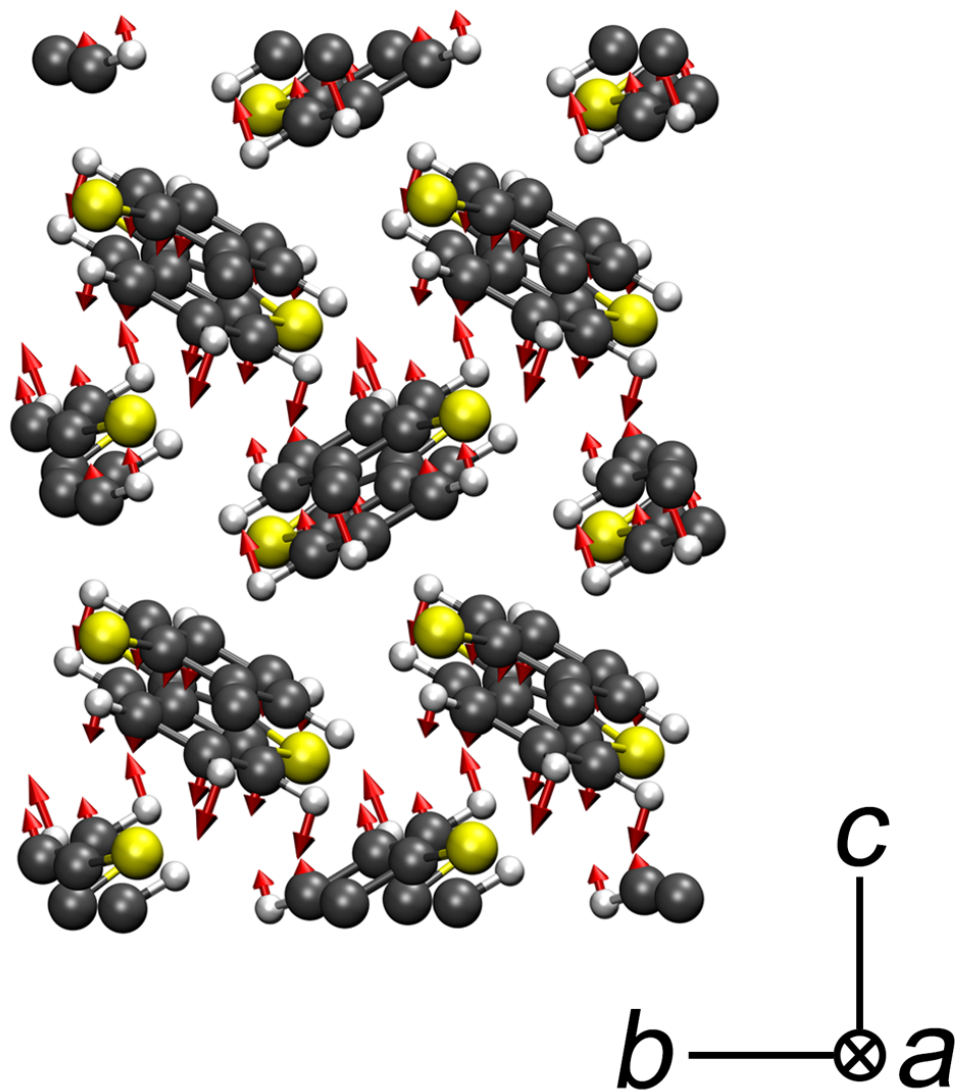

**Figure S6:** Calculated molecular motions of BTBT low-frequency vibrational mode with vibrational transition frequency of  $93.64 \text{ cm}^{-1}$ , with atomic displacements illustrated with red arrows.

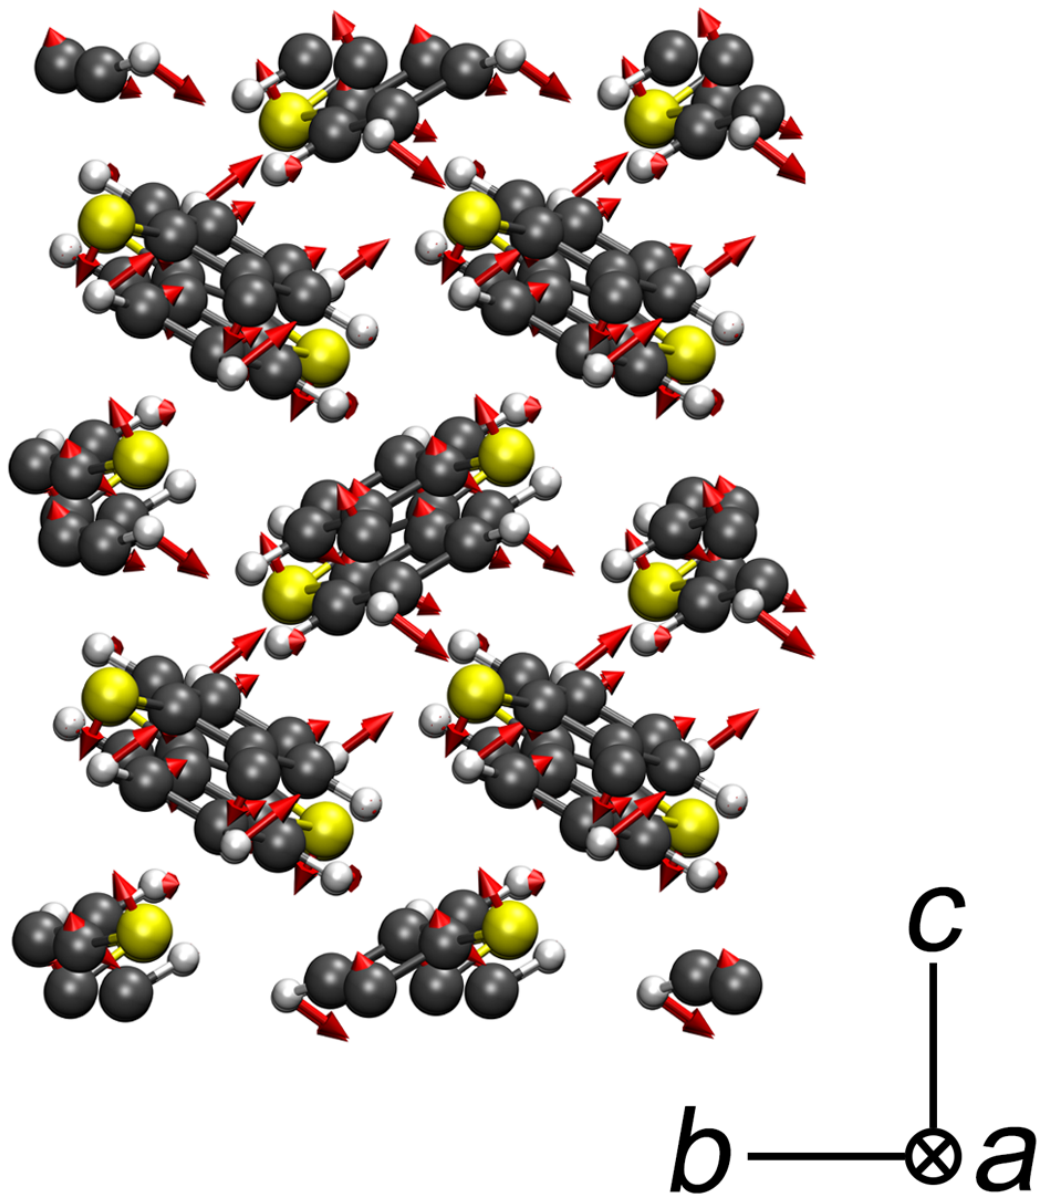

**Figure S7:** Calculated molecular motions of BTBT low-frequency vibrational mode with vibrational transition frequency of  $109.91\text{ cm}^{-1}$ , with atomic displacements illustrated with red arrows.
